# Supplementary material
Source: publisher figshare collection journal article supplement (https://acs.figshare.com/ndownloader/files/10660375)
Supplement: Supplementary file 1 [file 10660375]

---

## Experimental and theoretical investigation of structures, stoichiometric diversity and bench stability of cocrystals with a volatile halogen bond donor

*Katarina Lisac, Vinko Nemec, Filip Topić, Mihails Arhangeliskis, Poppy Hindle, Ricky Tran, Igor Huskić, Andrew J. Morris, Tomislav Friščić\* and Dominik Cincić\**

---

### Table of Contents

---

|                    |                                                                                                                                                                                                                                                                        |   |
|--------------------|------------------------------------------------------------------------------------------------------------------------------------------------------------------------------------------------------------------------------------------------------------------------|---|
| <b>Figure S1.</b>  | Molecular structure of <b>(acr)<sub>2</sub>(ofib)</b> showing the atom-labelling scheme. Displacement ellipsoids are drawn at the 50 % probability level, halogen bonds are marked with red dashed lines, and H atoms are shown as small spheres of arbitrary radius.  | 2 |
| <b>Figure S2.</b>  | Molecular structure of <b>(phen)<sub>2</sub>(ofib)</b> showing the atom-labelling scheme. Displacement ellipsoids are drawn at the 30 % probability level, halogen bonds are marked with red dashed lines, and H atoms are shown as small spheres of arbitrary radius. | 2 |
| <b>Figure S3.</b>  | Molecular structure of <b>(phen)(ofib)</b> showing the atom-labelling scheme. Displacement ellipsoids are drawn at the 50 % probability level, halogen bonds are marked with red dashed lines, and H atoms are shown as small spheres of arbitrary radius.             | 3 |
| <b>Figure S4.</b>  | TGA and DTA curves for the cocrystal <b>(acr)<sub>2</sub>(ofib)</b> .                                                                                                                                                                                                  | 3 |
| <b>Figure S5.</b>  | DSC and TGA curves for the cocrystal <b>(phen)<sub>2</sub>(ofib)</b> .                                                                                                                                                                                                 | 4 |
| <b>Figure S6.</b>  | DSC and TGA curves for the cocrystal <b>(phen)(ofib)</b> .                                                                                                                                                                                                             | 4 |
| <b>Figure S7.</b>  | IR-ATR spectrum of solid <b>phen</b> reactant.                                                                                                                                                                                                                         | 5 |
| <b>Figure S8.</b>  | IR-ATR spectrum of solid <b>acr</b> reactant.                                                                                                                                                                                                                          | 5 |
| <b>Figure S9.</b>  | IR-ATR spectrum of the cocrystal <b>(acr)<sub>2</sub>(ofib)</b> .                                                                                                                                                                                                      | 6 |
| <b>Figure S10.</b> | Overlay of IR-ATR spectra of the cocrystals <b>(phen)<sub>2</sub>(ofib)</b> and <b>(phen)(ofib)</b> .                                                                                                                                                                  | 6 |

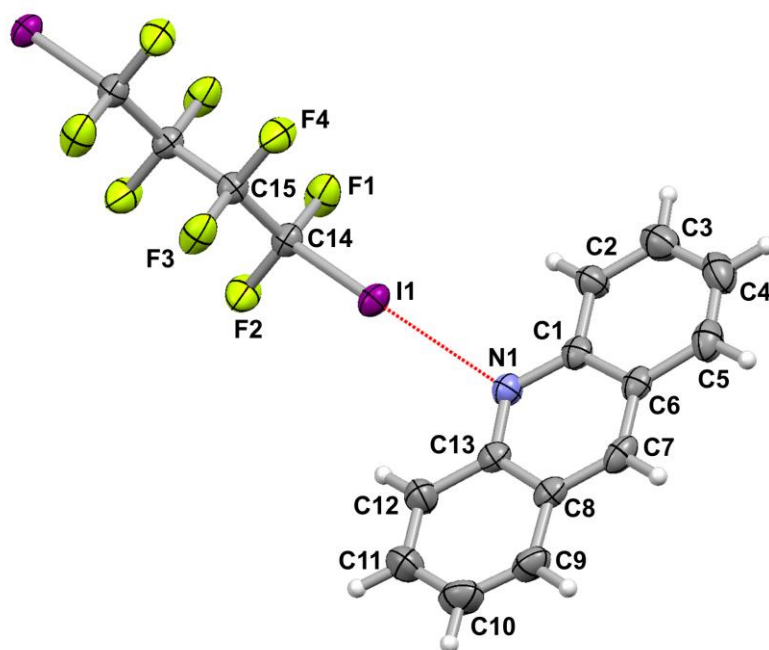

**Figure S1.** Molecular structure of (acr)<sub>2</sub>(ofib) showing the atom-labelling scheme. Displacement ellipsoids are drawn at the 50 % probability level, halogen bonds are marked with red dashed lines, and H atoms are shown as small spheres of arbitrary radius.

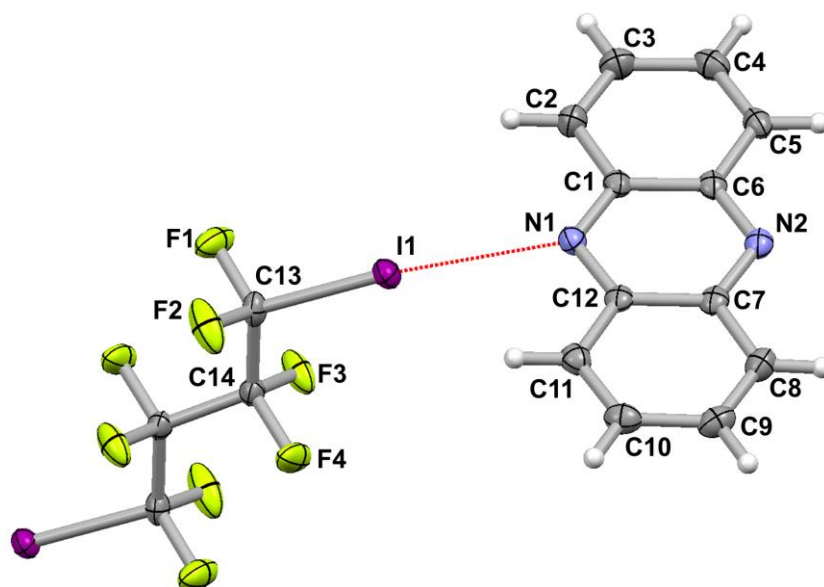

**Figure S2.** Molecular structure of (phen)<sub>2</sub>(ofib) showing the atom-labelling scheme. Displacement ellipsoids are drawn at the 30 % probability level, halogen bonds are marked with red dashed lines, and H atoms are shown as small spheres of arbitrary radius.

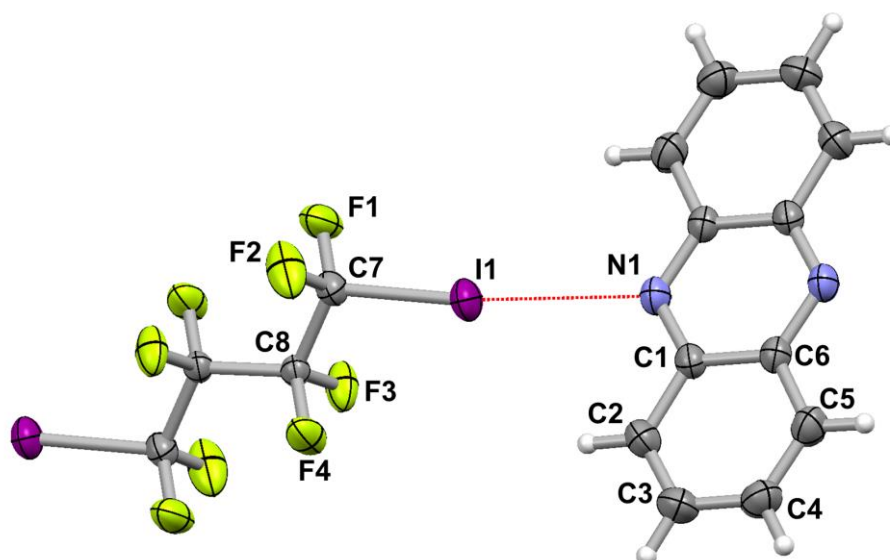

**Figure S3.** Molecular structure of (phen)(ofib) showing the atom-labelling scheme. Displacement ellipsoids are drawn at the 50 % probability level, halogen bonds are marked with red dashed lines, and H atoms are shown as small spheres of arbitrary radius.

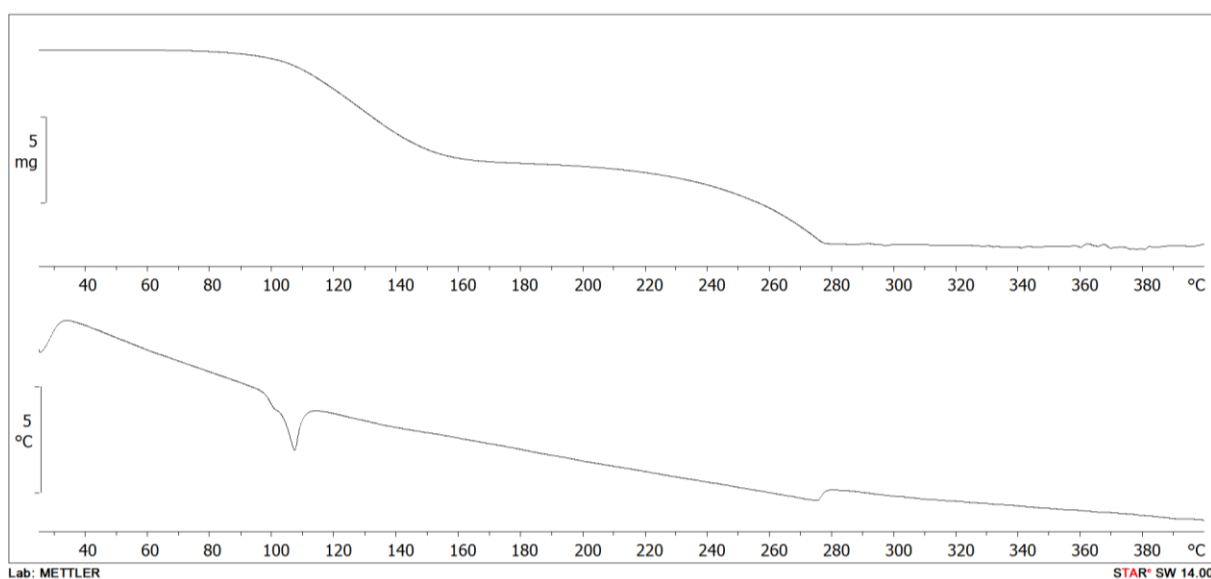

**Figure S4.** TGA (top) and DTA (bottom) curves for the cocrystal (acr)<sub>2</sub>(ofib).

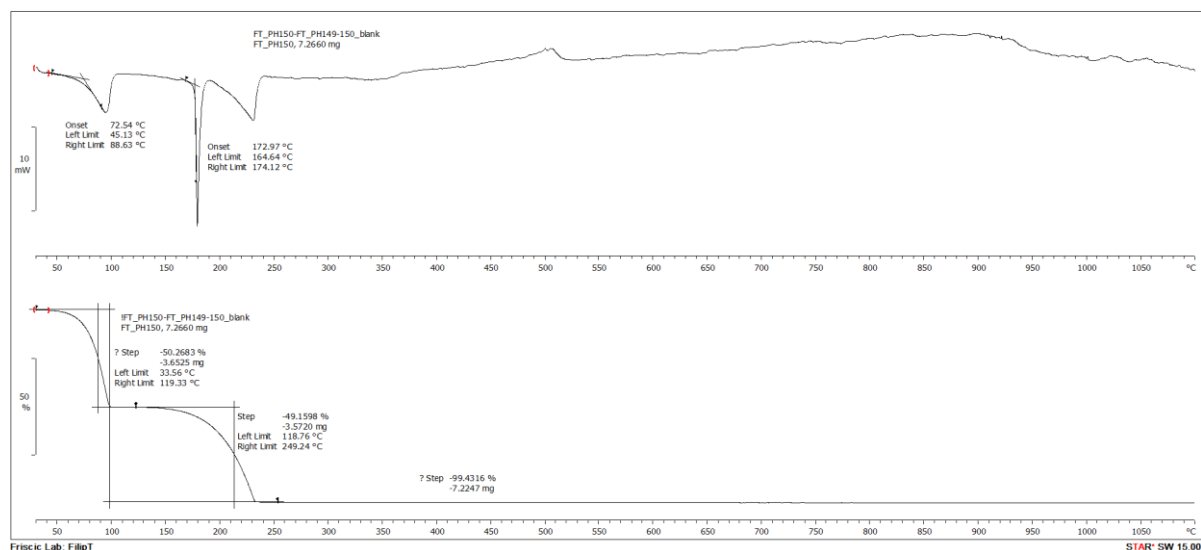

**Figure S5.** DSC (top) and TGA (bottom) curves for the cocrystal (phen)<sub>2</sub>(ofib).

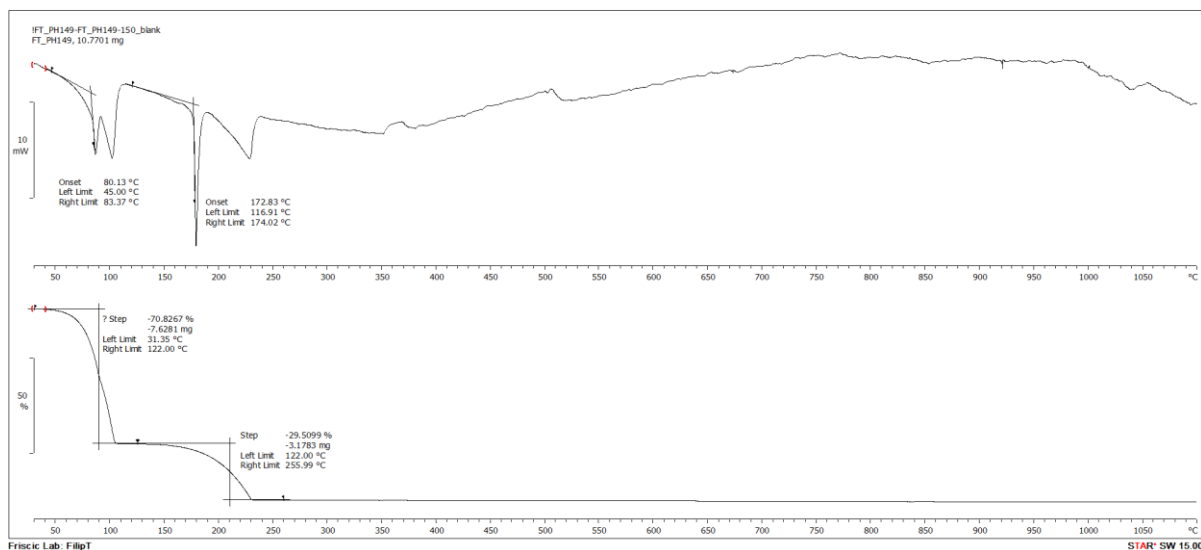

**Figure S6.** DSC (top) and TGA (bottom) curves for the cocrystal (phen)(ofib).

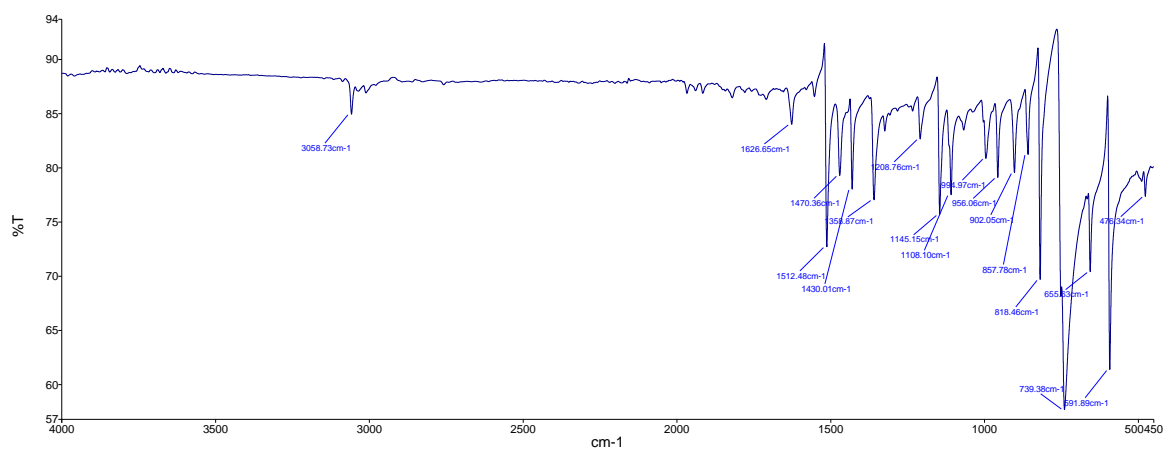

**Figure S7.** IR-ATR spectrum of solid **phen** reactant.

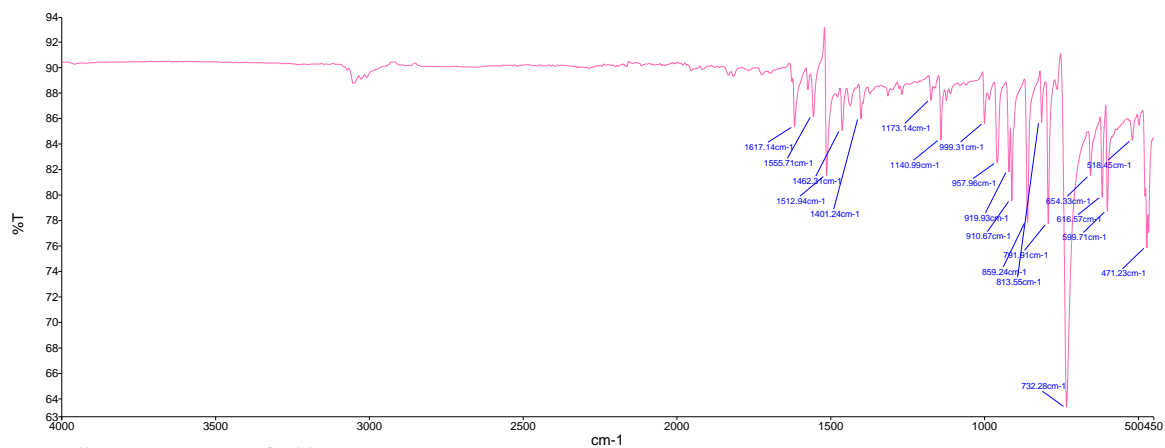

**Figure S8.** IR-ATR spectrum of solid **acr** reactant.

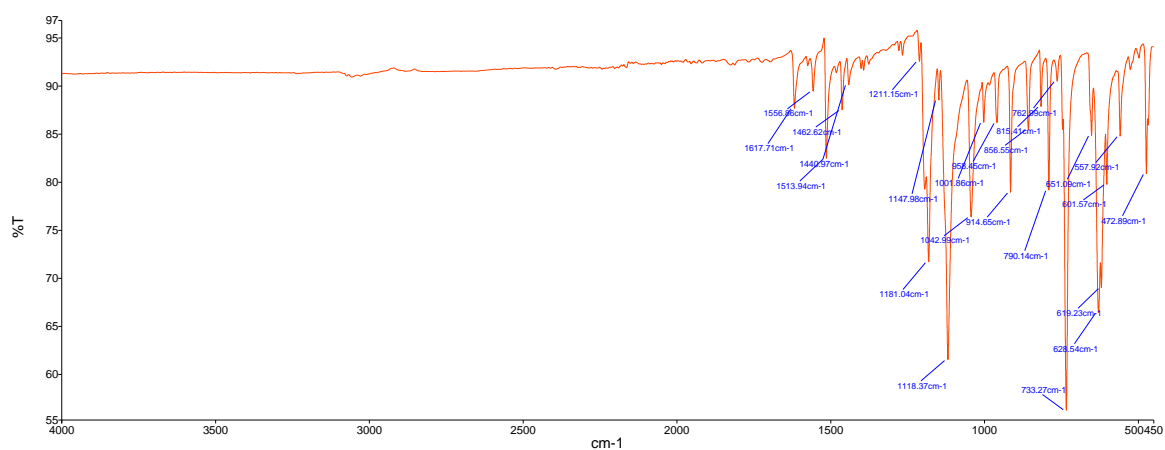

**Figure S9.** IR-ATR spectrum of the cocrystal **(acr)<sub>2</sub>(ofib)**.

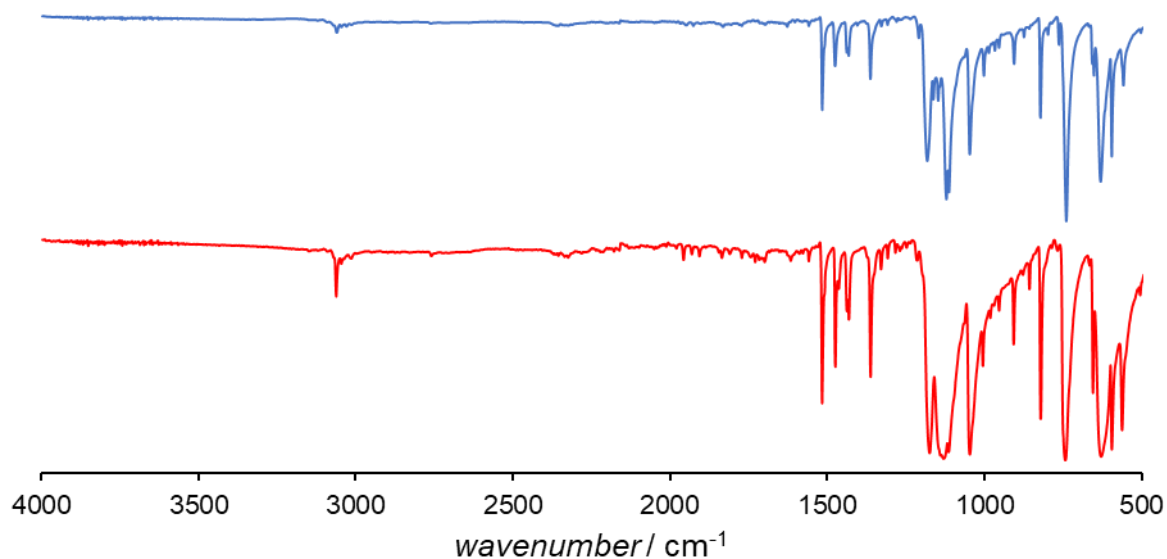

**Figure S10.** Overlay of IR-ATR spectra of the cocrystals **(phen)<sub>2</sub>(ofib)** (blue) and **(phen)(ofib)** (red).
